# Supplementary material for: Combination of Vitamin C and Lenvatinib potentiates antitumor effects in hepatocellular carcinoma cells in vitro
Source: PeerJ journal article supplement (doi:10.7717/peerj.14610), 2023-01-25
Supplement: raw_data_of_Figur_1B.xlsx [file raw_data_of_Figur_1B.xlsx]

## Sheet: Sheet1
Hep3B	Days	VC （0 mM）				VC （0.3 mM）				VC （0.6 mM）				VC （0.9 mM）
	0	0.3556	0.3562	0.353	0.3545	0.3556	0.3562	0.353	0.3545	0.3556	0.3562	0.353	0.3545	0.3556	0.3562	0.353	0.3545
	1	0.3591	0.365	0.3799	0.3691	0.3355	0.358	0.3405	0.3517	0.3959	0.367	0.3673	0.3793	0.3413	0.316	0.3041	0.3107
	2	0.5647	0.5869	0.5933	0.5041	0.472	0.418	0.4935	0.4924	0.4438	0.4779	0.4811	0.4623	0.3656	0.4192	0.3715	0.3582
	3	0.6201	0.5904	0.5731	0.6159	0.4603	0.5056	0.5222	0.4497	0.4286	0.5002	0.522	0.5176	0.3802	0.4104	0.4406	0.4414
	4	0.739	0.8062	0.7319	0.8144	0.7156	0.685	0.6891	0.70429	0.6971	0.6441	0.7043	0.708375	0.5724	0.5681	0.4598	0.5688
SK-Hep-1	Days	VC （0 mM）				VC （0.5 mM）				VC （1.0 mM）				VC （1.5 mM）
	0	0.2325	0.2384	0.2356	0.2385	0.2325	0.2384	0.2356	0.2385	0.2325	0.2384	0.2356	0.2385	0.2325	0.2384	0.2356	0.2385
	1	0.2554	0.2553	0.2443	0.2517	0.2568	0.2403	0.255	0.2343	0.2578	0.2539	0.2221	0.2486	0.2541	0.2426	0.2324	0.2391
	2	0.2647	0.2735	0.2711	0.3025	0.2612	0.2962	0.2807	0.2701	0.269	0.2691	0.265	0.2739	0.2388	0.2279	0.2185	0.2262
	3	0.3838	0.381	0.3606	0.3408	0.3665	0.3627	0.3329	0.3469	0.3172	0.3346	0.3438	0.3218	0.3023	0.3076	0.2656	0.2939
	4	0.4999	0.5086	0.54871	0.5334	0.4698	0.4796	0.4864	0.475	0.4536	0.45424	0.45211	0.43231	0.3531	0.3435	0.387	0.3725
Huh-7	Days	VC （0 mM）				VC （1 mM）				VC （2 mM）				VC （3 mM）
	0	0.3833	0.3768	0.3881	0.4146	0.3833	0.3768	0.3881	0.4146	0.3833	0.3768	0.3881	0.4146	0.3833	0.3768	0.3881	0.4146
	1	0.4103	0.4007	0.4197	0.406	0.3993	0.3955	0.4042	0.3998	0.3661	0.3477	0.3546	0.3498	0.3037	0.3029	0.2882	0.2967
	2	0.6289	0.6594	0.617	0.5518	0.5283	0.5571	0.5204	0.4904	0.4458	0.4661	0.4054	0.3896	0.3491	0.3464	0.3559	0.3689
	3	0.6848	0.6848	0.6763	0.66943	0.6248	0.6848	0.6763	0.5943	0.432	0.5328	0.5326	0.5319	0.352	0.3895	0.3641	0.3042
	4	0.7512	0.7851	0.9136	0.8661	0.6774	0.831	0.8195	0.7688	0.5154	0.5894	0.5824	0.5914	0.3359	0.3124	0.3212	0.3195
