# Supplementary material for: Combination of Vitamin C and Lenvatinib potentiates antitumor effects in hepatocellular carcinoma cells in vitro
Source: PeerJ journal article supplement (doi:10.7717/peerj.14610), 2023-01-25
Supplement: raw_data_of_Figur_3B.xlsx [file raw_data_of_Figur_3B.xlsx]

## Sheet: Sheet1
Hep3B	Days	Vehicle				LEN				VC				Combination
	0	0.3585	0.3537	0.34787	0.3581	0.3585	0.3537	0.34787	0.3581	0.3585	0.3537	0.34787	0.3581	0.3585	0.3537	0.34787	0.3581
	1	0.3801	0.3623	0.3629	0.381	0.3757	0.3849	0.3914	0.3948	0.3695	0.3989	0.3734	0.3902	0.3243	0.3497	0.3302	0.3283
	2	0.5109	0.5263	0.5232	0.5253	0.4364	0.4586	0.4563	0.4586	0.5005	0.4923	0.4833	0.4621	0.34154	0.34239	0.354431	0.354327
	3	0.5991	0.5852	0.5904	0.596	0.4619	0.4395	0.4898	0.4736	0.4802	0.5087	0.4628	0.4908	0.3597	0.379	0.3754	0.3633
	4	0.8514	0.8897	0.8817	0.817	0.7106	0.7399	0.7163	0.6695	0.714	0.6775	0.718	0.6207	0.5641	0.561784	0.591	0.5445
SK-Hep-1	Days	Vehicle				LEN				VC				Combination
	0	0.2414	0.2345	0.2322	0.2321	0.2414	0.2345	0.2322	0.2321	0.2414	0.2345	0.2322	0.2321	0.2414	0.2345	0.2322	0.2321
	1	0.24266	0.2341	0.2439	0.24365	0.239	0.2208	0.2211	0.2578	0.2481	0.2158	0.2295	0.2424	0.2277	0.233	0.2415	0.2483
	2	0.2616	0.2765	0.2555	0.2689	0.2401	0.2614	0.2436	0.2476	0.2351	0.2422	0.2374	0.2454	0.2029	0.2168	0.2275	0.2241
	3	0.358	0.3532	0.3509	0.3379	0.3125	0.3069	0.2994	0.3292	0.3137	0.3143	0.284	0.3129	0.2703	0.2493	0.2773	0.2583
	4	0.54928	0.559	0.4997	0.5374	0.4364	0.45089	0.4725	0.4626	0.3305	0.3803	0.3886	0.4019	0.2711	0.3179	0.3211	0.3023
Huh-7	Days	Vehicle				LEN				VC				Combination
	0	0.37417	0.384058	0.3948	0.4003	0.37417	0.384058	0.3948	0.4003	0.37417	0.384058	0.3948	0.4003	0.37417	0.384058	0.3948	0.4003
	1	0.3824	0.4038	0.3858	0.4139	0.3551	0.3715	0.3911	0.3846	0.349	0.3489	0.3661	0.3555	0.2772	0.2758	0.3032	0.3145
	2	0.6235	0.6054	0.6548	0.6751	0.4335	0.4571	0.4774	0.5036	0.4411	0.4291	0.4897	0.4033	0.2987	0.3149	0.3231	0.3142
	3	0.6766	0.67216	0.623	0.6996	0.4551	0.4576	0.4541	0.4457	0.574	0.5145	0.4369	0.4363	0.256	0.3161	0.2876	0.2764
	4	0.9028	0.8886	1.0145	1.0023	0.5005	0.4805	0.5381	0.4574	0.5851	0.5277	0.541	0.545	0.2786	0.3	0.3114	0.2978
