# Supplementary material for: Combination of Vitamin C and Lenvatinib potentiates antitumor effects in hepatocellular carcinoma cells in vitro
Source: PeerJ journal article supplement (doi:10.7717/peerj.14610), 2023-01-25
Supplement: raw_data_of_Figure_1A.xlsx [file raw_data_of_Figure_1A.xlsx]

## Sheet: Sheet1
Hep3B	VC concentration(mM)
	0	0.5102	0.4933	0.4969	0.4964
	0.25	0.5018	0.523	0.4799	0.4989
	0.5	0.4909	0.4857	0.4641	0.4766
	0.75	0.4026	0.387	0.3675	0.4085
	1	0.315	0.2933	0.3115	0.3116
	1.25	0.2686	0.2633	0.2453	0.2509
	1.5	0.2344	0.2083	0.2412	0.238
	Blank	0.17534	0.17535	0.1754	0.1753
Huh7	VC concentration(mM)
	0	0.8263	0.8343	0.7891	0.8003
	0.5	0.6902	0.7174	0.6967	0.6862
	1	0.694	0.661	0.6372	0.6648
	1.5	0.6371	0.6632	0.6752	0.633
	2	0.665	0.6873	0.7111	0.7231
	2.5	0.6385	0.6926	0.6606	0.6735
	3	0.431	0.4267	0.5171	0.5395
	3.5	0.3574	0.3863	0.4049	0.3799
	4	0.2208	0.2294	0.2818	0.2733
	4.5	0.2303	0.2233	0.2419	0.3133
	Blank	0.1523	0.1603	0.1584	0.1591
SK-Hep-1	VC concentration(mM)
	0	0.267562	0.289963	0.283262	0.259462
	0.5	0.292063	0.264162	0.229762	0.261763
	0.75	0.252763	0.264562	0.267962	0.273762
	1	0.247262	0.232563	0.269162	0.253163
	1.25	0.178862	0.195362	0.185163	0.213162
	1.5	0.0944625	0.0919625	0.100262	0.0891625
	1.75	0.0568625	0.0251625	0.0645625	0.0396625
	2	0.0472625	0.0394625	0.0339625	0.0387625
	2.5	0.0163625	0.0143625	0.0213625	0.0211625
	Blank	0.1675	0.1722	0.1687	0.1704
