# Supplementary material for: Combination of Vitamin C and Lenvatinib potentiates antitumor effects in hepatocellular carcinoma cells in vitro
Source: PeerJ journal article supplement (doi:10.7717/peerj.14610), 2023-01-25
Supplement: raw_data_of_Figure_1C.xlsx [file raw_data_of_Figure_1C.xlsx]

## Sheet: Sheet1
Hep3B	VC concentration(mM)							mean	SD
	0	300	350	317	323	320		322	18.0139
	0.3	170	211	210	170	189		190	20.2608
	0.6	52	77	64	66	71		66	9.30054
Huh7	VC concentration(mM)
	0	312	246	260	268	267		270.6	24.7548
	1	33	53	47	48	48		45.8	7.52994
	2	8	9	7	16	18		11.6	5.02991
SK-Hep-1	VC concentration(mM)
	0	253	207	213	220	250		228.6	21.4313
	0.5	104	156	120	130	140		130	19.6977
	1	79	63	70	78	90		76	10.1735
