# Supplementary material for: Combination of Vitamin C and Lenvatinib potentiates antitumor effects in hepatocellular carcinoma cells in vitro
Source: PeerJ journal article supplement (doi:10.7717/peerj.14610), 2023-01-25
Supplement: raw_data_of_Figure_2.xlsx [file raw_data_of_Figure_2.xlsx]

## Sheet: Sheet1
Hep3B	VC concentration(mM)	Migration						mean	SD		Invasion						mean	SD
	0	55	45	42	65	66		54.6	11.0589		70	50	66	50	61		59.4	9.15423
	0.5	8	16	12	11	16		12.6	3.43511		19	9	11	17	18		14.8	4.49444
	1	8	2	6	4	6		5.2	2.28035		2	3	6	6	4		4.2	1.78885
SK-Hep-1	VC concentration(mM)	Migration									Invasion
	0	233	187	190	200	150		192	29.7405		190	150	158	187	180		173	17.9444
	0.5	108	77	84	88	73		86	13.6198		98	80	72	76	88		82.8	10.3537
	1	40	58	57	50	53		51.6	7.23187		53	57	45	35	43		46.6	8.6487
Huh7	VC concentration(mM)	Migration									Invasion
	0	104	82	100	70	108		92.8	16.1617		111	68	74	70	105		85.6	20.6712
	1	38	22	21	36	29		29.2	7.79102		30	22	25	33	24		26.8	4.54973
	2	7	3	5	8	6		5.8	1.92354		5	2	4	3	3		3.4	1.14018
