# Supplementary material for: Combination of Vitamin C and Lenvatinib potentiates antitumor effects in hepatocellular carcinoma cells in vitro
Source: PeerJ journal article supplement (doi:10.7717/peerj.14610), 2023-01-25
Supplement: raw_data_of_Figure_3A.xlsx [file raw_data_of_Figure_3A.xlsx]

## Sheet: Sheet1
Hep3B	0mM VC				0.25 mM VC				0.5 mM VC				0.75 mM VC
LEN （μM）
0	0.6066	0.6871	0.5869	0.6787	0.6103	0.6067	0.6556	0.678	0.4412	0.4305	0.4389	0.4564	0.3722	0.3611	0.3837	0.3557
1	0.5854	0.5968	0.5636	0.5159	0.5378	0.5387	0.4586	0.5391	0.4596	0.4386	0.4235	0.4378	0.3542	0.3753	0.3809	0.3964
2	0.5931	0.5094	0.4785	0.5498	0.5503	0.5402	0.5649	0.5537	0.3889	0.4235	0.4186	0.4525	0.324	0.3517	0.3479	0.3391
4	0.5461	0.4703	0.5352	0.5244	0.4876	0.5006	0.4725	0.4923	0.3611	0.4003	0.3957	0.3954	0.2934	0.2988	0.348	0.3531
8	0.5012	0.4273	0.4654	0.4292	0.4516	0.4081	0.4138	0.4639	0.348	0.3586	0.3538	0.351	0.2786	0.2861	0.2895	0.2977
16	0.3729	0.365	0.3363	0.3679	0.3416	0.3542	0.371	0.3594	0.2926	0.2858	0.2812	0.3043	0.2654	0.2343	0.244	0.2658
32	0.3026	0.2922	0.2869	0.2698	0.3129	0.32	0.3173	0.3223	0.2634	0.2659	0.2699	0.2681	0.2344	0.2245	0.2423	0.2396
BLANK	0.19359				0.19359				0.1809				0.1809
SK-Hep-1	0mM VC				1 mM VC				1.25 mM VC				1.5 mM VC
LEN （μM）
0	0.465	0.4275	0.4095	0.3877	0.4525	0.4648	0.5215	0.5025	0.417474	0.386993	0.375893	0.370095	0.2963	0.3117	0.3006	0.2849
1	0.451891	0.470546	0.401236	0.416391	0.4621	0.4945	0.4666	0.4358	0.405893	0.35223	0.35673	0.35363	0.3306	0.3512	0.3557	0.3526
2	0.433291	0.436391	0.403882	0.420382	0.4599	0.417877	0.428	0.4405	0.379294	0.346239	0.349639	0.341985	0.304	0.2957	0.2991	0.3162
4	0.4182	0.439545	0.437791	0.433945	0.410346	0.4143	0.4257	0.4216	0.316785	0.326739	0.312484	0.305784	0.291	0.2762	0.2867	0.28
8	0.376	0.4067	0.4405	0.4035	0.3633	0.356155	0.3722	0.3724	0.306084	0.302239	0.297939	0.275085	0.2803	0.2517	0.2474	0.2493
16	0.3309	0.3715	0.3551	0.3855	0.323145	0.323246	0.321446	0.304236	0.29193	0.298239	0.285939	0.284539	0.26615	0.2477	0.2354	0.234
32	0.2392	0.244	0.2484	0.2278	0.2538	0.2404	0.238391	0.246945	0.24893	0.260984	0.24543	0.24583	0.2479	0.2352	0.2444	0.2448
BLANK	0.17488				0.17488				0.17488				0.17385
Huh7	0mM VC				1 mM VC				2 mM VC				3 mM VC
LEN （μM）
0	0.6667	0.6493	0.7023	0.8342	0.6456	0.6534	0.6083	0.6737	0.4925	0.5375	0.554	0.5471	0.4053	0.4852	0.4776	0.4713
1	0.7856	0.7	0.7483	0.7655	0.7013	0.6896	0.7129	0.6599	0.6212	0.6177	0.6579	0.6684	0.4532	0.5132	0.5067	0.5976
2	0.6699	0.6583	0.705	0.696	0.619	0.6048	0.6305	0.6113	0.6089	0.5385	0.5813	0.6136	0.479	0.4599	0.5362	0.51678
4	0.6171	0.6308	0.5961	0.6491	0.6094	0.6122	0.5647	0.6054	0.506	0.5284	0.5467	0.5358	0.5079	0.4788	0.5327	0.51625
8	0.5762	0.5963	0.5519	0.6219	0.6097	0.5472	0.5681	0.5101	0.4489	0.4815	0.5006	0.5432	0.4171	0.4624	0.4227	0.5038
16	0.5092	0.5047	0.4768	0.5288	0.4675	0.4742	0.5162	0.5019	0.3911	0.3567	0.4368	0.3827	0.3779	0.3924	0.4161	0.4275
32	0.4106	0.4002	0.4006	0.4069	0.3794	0.3772	0.3804	0.3921	0.3389	0.3655	0.3988	0.5055	0.3266	0.3079	0.3466	0.3836
BLANK	0.1709				0.1709				0.16571				0.17264
