# Supplementary material for: Combination of Vitamin C and Lenvatinib potentiates antitumor effects in hepatocellular carcinoma cells in vitro
Source: PeerJ journal article supplement (doi:10.7717/peerj.14610), 2023-01-25
Supplement: raw_data_of_Figure_3C.xlsx [file raw_data_of_Figure_3C.xlsx]

## Sheet: Sheet1
Hep3B								mean	SD
	Vehicle	335	295	285	311	340		313.2	24.1081
	LEN	93	66	71	80	98		81.6	13.7586
	VC	60	73	55	90	88		73.2	15.8651
	Combination	33	15	22	34	25		25.8	7.91833
SK-Hep-1								mean	SD
	Vehicle	310	225	280	265	240		264	33.429
	LEN	122	112	80	102	86		100.4	17.5157
	VC	59	63	40	50	53		53	8.86002
	Combination	16	10	8	5	11		10	4.06202
Huh7								mean	SD
	Vehicle	368	340	310	388	360		353.2	29.6513
	LEN	201	145	176	180	145		169.4	24.2136
	VC	216	220	183	220	195		206.8	16.8731
	Combination	77	66	60	55	48		61.2	11.0318
