# Supplementary material for: Combination of Vitamin C and Lenvatinib potentiates antitumor effects in hepatocellular carcinoma cells in vitro
Source: PeerJ journal article supplement (doi:10.7717/peerj.14610), 2023-01-25
Supplement: raw_data_of_Figure_4A-4B.xlsx [file raw_data_of_Figure_4A-4B.xlsx]

## Sheet: Sheet1
Hep3B		Migration （4A）						mean	SD		Invasion （4B）						mean	SD
	Vehicle	56	40	58	35	47		47.2	9.93479		44	38	52	30	44		41.6	8.17313
	LEN	26	20	20	12	15		18.6	5.36656		10	9	18	12	18		13.4	4.3359
	VC	19	11	12	21	15		15.6	4.3359		22	10	18	10	15		15	5.19615
	Combination	10	6	6	5	9		7.2	2.16795		5	5	11	10	10		8.2	2.94958
SK-Hep-1		Migration （4A）						mean	SD		Invasion （4B）						mean	SD
	Vehicle	310	305	273	240	255		276.6	30.5827		312	270	255	288	243		273.6	27.2819
	LEN	165	140	148	132	147		146.4	12.2188		160	155	150	130	110		141	20.7364
	VC	167	160	140	155	120		148.4	18.7163		158	132	125	103	155		134.6	22.7002
	Combination	38	22	30	33	34		31.4	5.98331		56	29	35	35	28		36.6	11.327
Huh7		Migration （4A）						mean	SD		Invasion （4B）						mean	SD
	Vehicle	85	78	75	50	60		69.6	14.2583		97	93	80	70	63		80.6	14.5362
	LEN	34	23	22	28	26		26.6	4.77493		41	22	30	28	35		31.2	7.19027
	VC	40	22	25	33	30		30	7.03562		34	20	25	27	31		27.4	5.41295
	Combination	6	4	5	4	1		4	1.87083		5	2	2	4	5		3.6	1.51658
