# Supplementary material for: Combination of Vitamin C and Lenvatinib potentiates antitumor effects in hepatocellular carcinoma cells in vitro
Source: PeerJ journal article supplement (doi:10.7717/peerj.14610), 2023-01-25
Supplement: raw_data_of_Figure_5.xlsx [file raw_data_of_Figure_5.xlsx]

## Sheet: Sheet1
Hep3B
VC	ACTB	c-MET	2-△CT
0	15.65	24.56	0.00207885
	14.93	23.78	0.00216713
	15.23	24.11	0.00212253
0.3	14.97	25.72	0.000580668
	15.11	24.99	0.00106126
	15.27	25.89	0.000635421
0.6	15.08	26.78	0.000300572
	15.13	27.11	0.000247549
	14.86	26.97	0.000226218
0.6	15.38	28.11	0.000147193
	15.03	27.61	0.000163321
	15.28	28.34	0.000117098
SK-Hep-1
VC	ACTB	c-MET	2-△CT
0	16.12	26.11	0.000983355
	16.57	26.58	0.000969817
	16.23	27.01	0.000568718
0.5	15.23	26.25	0.000481559
	15.44	26.48	0.000474929
	15.27	26.7	0.000362433
1	16.47	28.58	0.000226218
	16.55	27.95	0.000370048
	16.87	28.66	0.000282395
1.5	14.58	28.43	6.77227e-05
	15.49	28.11	0.000158855
	15.01	28.25	0.000103362
Huh7
VC	ACTB	c-MET	2-△CT
0	15.43	22.54	0.00723897
	15.41	22.4	0.00786684
	15.88	22.8	0.00825795
1	15.98	23.58	0.00515433
	15.23	24.05	0.00221266
	15.67	23.88	0.0033771
2	15.44	24.89	0.00142977
	15.67	24.7	0.00191293
	15.05	24.51	0.0014199
3	16.05	25.27	0.00167689
	15.58	25.91	0.000776891
	15.67	25.47	0.00112178
