# Supplementary material for: Combination of Vitamin C and Lenvatinib potentiates antitumor effects in hepatocellular carcinoma cells in vitro
Source: PeerJ journal article supplement (doi:10.7717/peerj.14610), 2023-01-25
Supplement: Supplemental_Figure_1.pdf [file Supplemental_Figure_1.pdf]

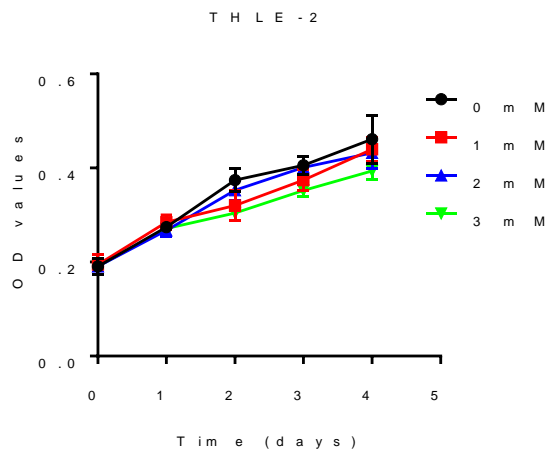

**Supplemental Figure 1. VC did not show an obvious cytotoxic effect on THLE-2 cells.** THLE-2 cells were treated with various concentrations of VC. At different time points, the cell proliferation was determined by CCK-8 assay.
